# Supplementary material for: The effect of age on vertex-based measures of the grey-white matter tissue contrast in autism spectrum disorder
Source: Springer Nature journal article supplement (doi:10.1186/s13229-018-0232-6), 2018-10-01

## A Main Effect of Group

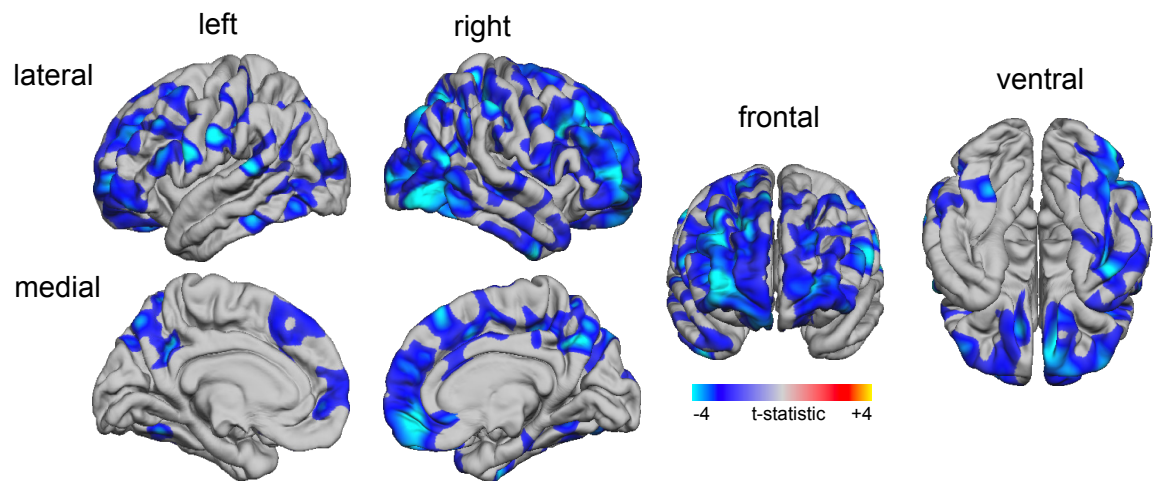

## B Linear Age-by-Group Interaction (Age x Group)

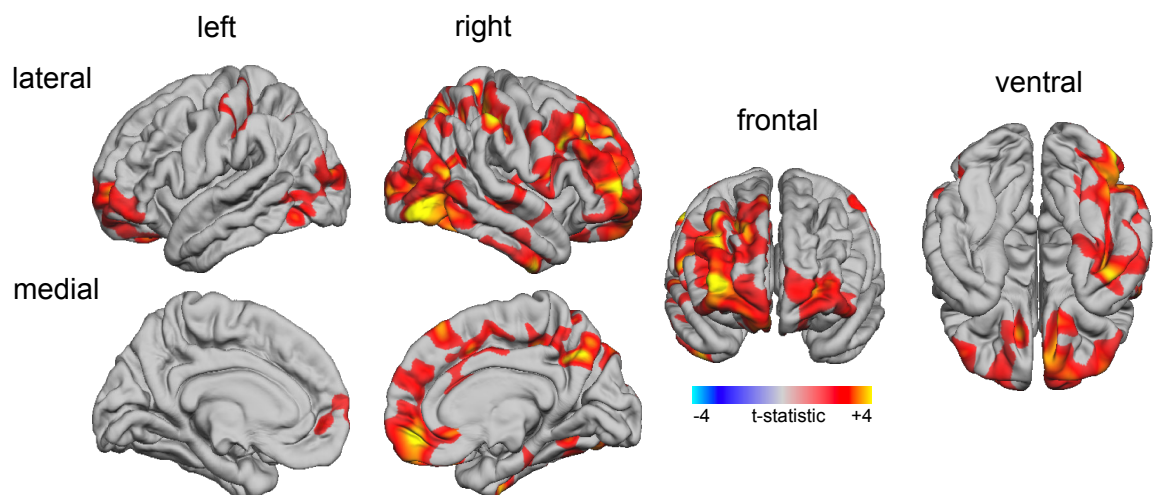

## C Quadratic Age-by-Group Interaction (Age<sup>2</sup> x Group)

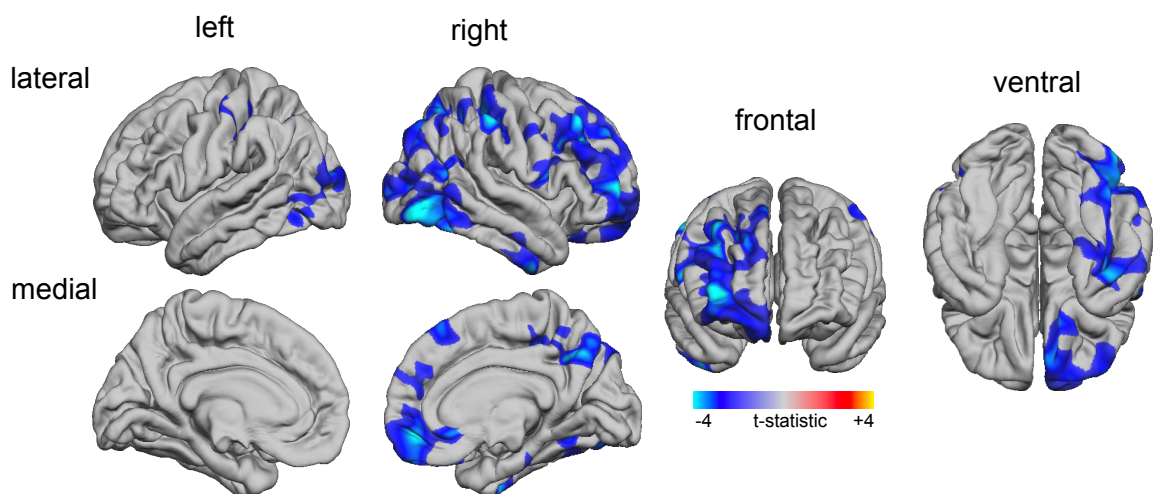

Supplement: MOESM1 [file 13229_2018_232_MOESM1_ESM.pdf]
