# Supplementary material for: The effect of age on vertex-based measures of the grey-white matter tissue contrast in autism spectrum disorder
Source: Springer Nature journal article supplement (doi:10.1186/s13229-018-0232-6), 2018-10-01

Empirical CDF

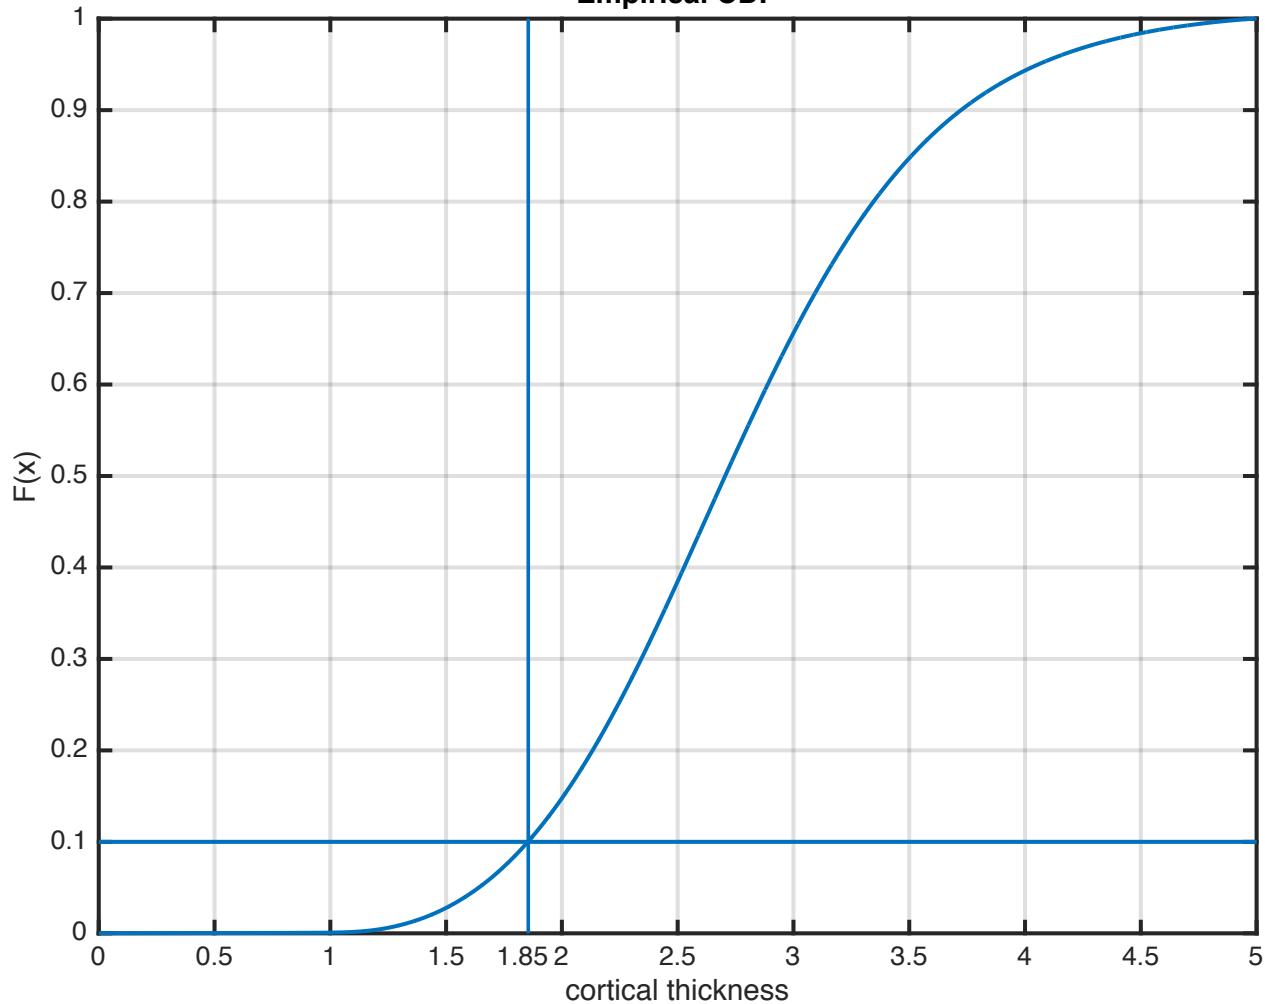

Supplement: MOESM2 [file 13229_2018_232_MOESM2_ESM.pdf]
